# Supplementary material for: Double-Labeling Method for Visualization and Quantification of Membrane-Associated Proteins in Lactococcus lactis
Source: MDPI journal article supplement (doi:10.3390/ijms241310586), 2023-06-24
Supplement: s1 [file s1]

## Supplemental Data

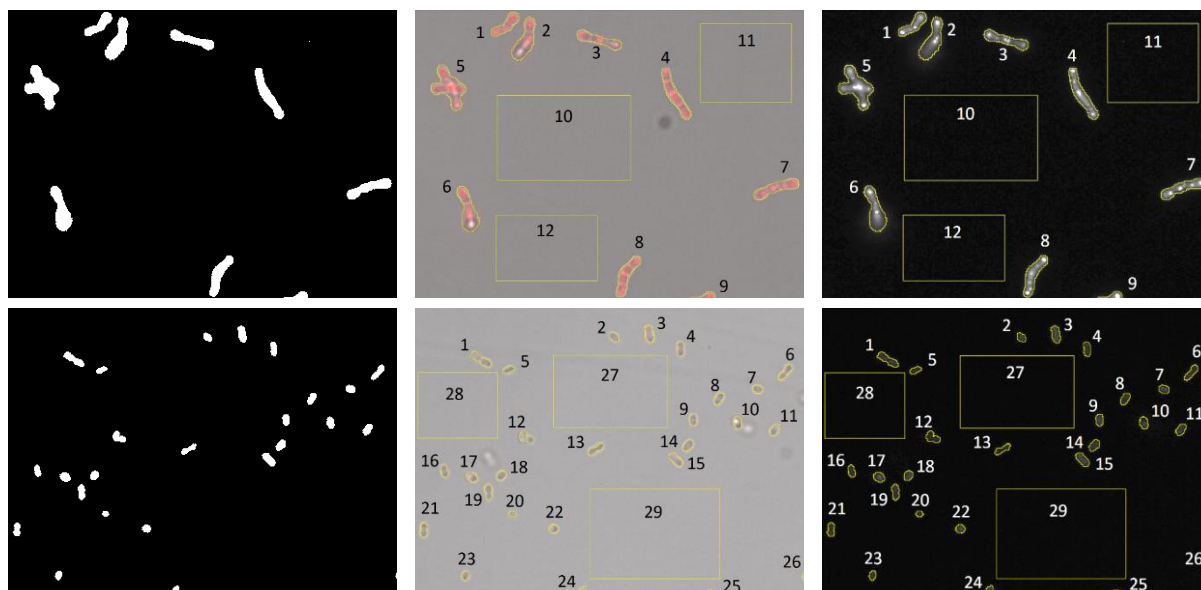

**Supplemental figure S1.** Process of image handling for microscopic fluorescence quantification. Upper row: NpB sample. Left: auto-threshold Li mode, middle: auto-selection of ROI from threshold and random selection of background, right: intensity measurement on raw monogram FLUO channel. Lower row: NpBE1 sample. Left: auto-threshold Max Entropy mode, middle: auto-selection of ROI from threshold and random selection of background, right: intensity statistics measurement on raw monogram FLUO channel

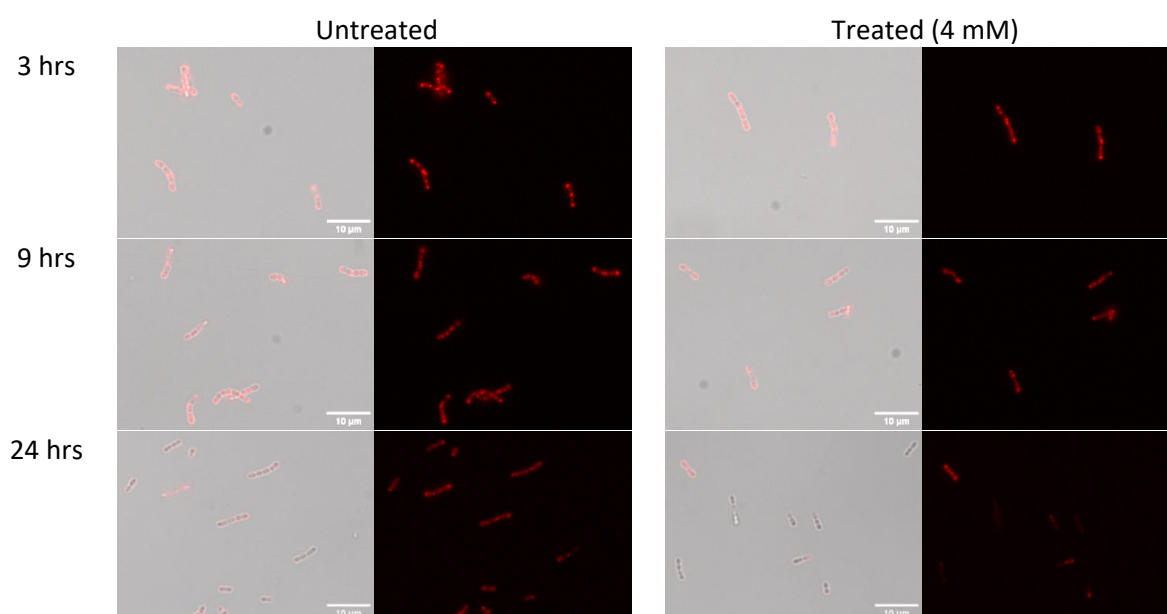

**Supplemental figure S2.** Visually observed effects in *L. lactis* NpB at 3-hour, 9-hour and 24-hour post induction with or without pre-treatment with Ellman's reagent (4 mM)

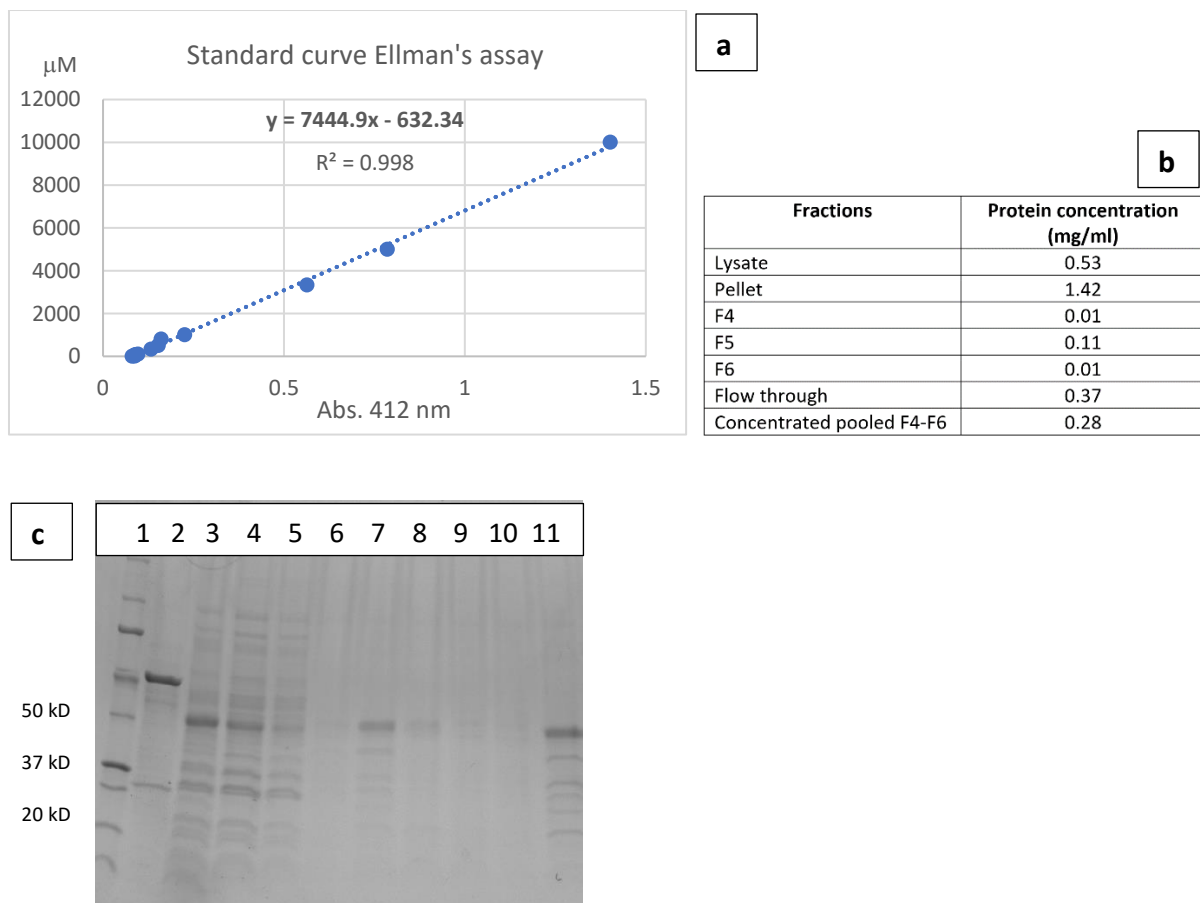

**Supplemental figure S3.** Supplemental data for Ellman's assay for sulfhydryl group quantification in bio-organism samples. **(a)** Standard curve of serial acetyl cysteine concentrations; **(b)** Protein concentration after IMAC purification; **(c)** Stain-free polyacrylamide gel after IMAC purification of BmpA from lysed NpB cells at 3-hour post induction, lane 2: positive control, lane 3 – 4: pellet – lysate, lane 5: flow through, lane 6 – 10: collected fractions, lane 11: buffer-exchanged concentrated pooled fraction.

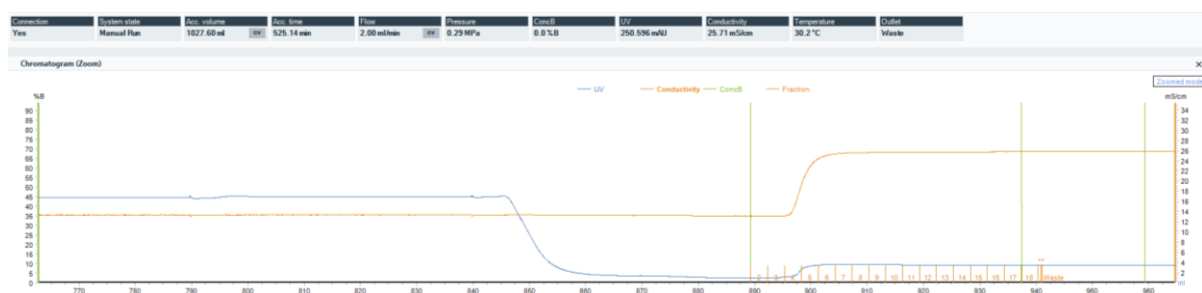

**Supplemental figure S4.** Graph of BmpA purification using Äkta Go and Unicorn software. A peak of protein was detected from fraction 4 and collected until fraction 8.

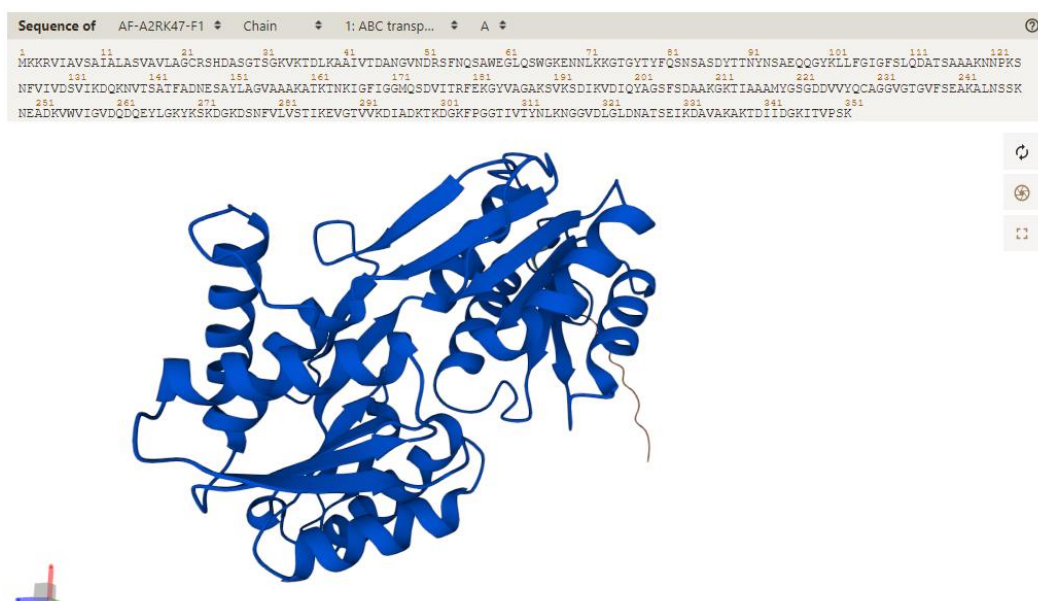

**Supplemental figure S5.** AlphaFold predicted protein structure of BmpA (available online at <https://alphafold.ebi.ac.uk/entry/A2RK47> and Uniprot, reference number: A2RK47 - BmpA\_LACLM). For predicted native localization of BmpA on *L. lactis*, refer to Berlec et. al. 2011

**Supplemental table S1.** List of *Lactococcus lactis* strains and plasmids

| Strains | Original Strains | Plasmids     | Protein of interest                      |
|---------|------------------|--------------|------------------------------------------|
| NpH     | NZ9000           | pNZ8150:HtrA | Recombinant HtrA with 6-His & 4-Cys tags |
| NpB     | NZ9000           | pNZ8150:BmpA | Recombinant BmpA with 6-His & 4-Cys tags |

**Supplemental table S2.** List of primers

| Name          | Sequence                                        | Length | Purpose                                                       |
|---------------|-------------------------------------------------|--------|---------------------------------------------------------------|
| Fw_HtrA_8150  | ATTATAAGGAGGCACTCAGTACTAT<br>GGCAAAAGCTAATATAGG | 43     | Amplify HtrA gene, incorporated with labelling tags.          |
| Rv1_HtrA_8150 | GGTGACCACTACCATTAGAAGAAGA<br>TGAACATTTTGTCT     | 41     | Amplify HtrA gene, incorporated with labelling tags.          |
| Rv2_HtrA_8150 | CAACAATGGTGATGGTGATGGTGAC<br>CACTACC            | 32     | Amplify HtrA and BmpA gene, incorporated with labelling tags. |
| Rv3_HtrA_8150 | GCTTTTAGCAACAAGGACCGCAACA<br>ATGGTGAT           | 33     | Amplify HtrA and BmpA gene, incorporated with labelling tags. |
| Rv4_HtrA_8150 | CTAATTTTGGTTCAAAGAAAGCTTTT<br>AGCAACAAGGAC      | 38     | Amplify HtrA gene, incorporated with labelling tags.          |
| Fw_BmpA_8150  | GAGGCACTCAGTACTATGAAAAAAC<br>GCGTAATCG          | 34     | Amplify BmpA gene, incorporated with labelling tags.          |
| R1_BmpA_8150  | GATGGTGACCACTACCTTTGAAGG<br>AACAG               | 30     | Amplify BmpA gene, incorporated with labelling tags.          |
| R4_BmpA_8150  | AGCTTGAGCTCGCTTTTAGCAACAAG<br>G                 | 27     | Amplify BmpA gene, incorporated with labelling tags.          |

|             |                                 |    |            |
|-------------|---------------------------------|----|------------|
| Fw_8150_MSC | CTTAATTCTATCTTGAGAAAGTATTG<br>G | 27 | sequencing |
| Rv_8150_MSC | GTAATTGCTTTATCAACTGCTGC         | 23 | sequencing |
| Fw_BmpA_seq | CAGGTGTCTTCAGTGAAGC             | 19 | sequencing |
| Rv_BmpA_seq | GGTCTTTAATGACAGAGTC             | 19 | sequencing |
| Fw_HtrA_seq | AAGATGGTTCTACCTCTGTGG           | 21 | sequencing |
| Rv_HtrA_seq | AACGGCAAGGTCAGTGTATTC           | 21 | sequencing |

## Reference

Berlec A, Zadavec P, Jevnikar Z, Štrukelj B. Identification of candidate carrier proteins for surface display on *Lactococcus lactis* by theoretical and experimental analyses of the surface proteome. *Applied and environmental microbiology*. 2011;77(4):1292–300.
